# Supplementary material for: End-of-Life Care During the Coronavirus Disease 2019 Pandemic: The 3 Wishes Program
Source: PubMed Central journal article supplement — Crit Care Explor. 2021 Oct 8;3(10):e549. doi: 10.1097/CCE.0000000000000549 (PMC8505331; doi:10.1097/cce.0000000000000549), 2021-10-08
Supplement: cc9-3-e549-s001.pdf [file cc9-3-e549-s001.pdf]

1 **eSupplement 1**

2 **UV Germicidal Irradiation for 3 Wishes Fingerprint Keepsakes for Patients Who Die from**  
3 **CoVID-19**

4 ***Healthcare Worker (HCW):***

5 In the event of a death from CoVID-19, fingerprint keepsakes can be offered to family members in the following  
6 manner:

- 7 1) The HCW asks family member whether they would like to receive keychains or mini-frame keepsakes with the  
8 patient's fingerprints. Family members are informed that the fingerprints will undergo UV germicidal irradiation, a  
9 method that we are currently using to re-use N95 masks for healthcare workers. Family members are told they are  
10 not obligated to receive these keepsakes—it is an option and the healthcare team will make and send these to  
11 families if they would like. If yes, ask how many they would like and make sure you have correct address to send to.
- 12 2) Remove the paper inserts from the proper number of mini-frames and keychains (do NOT bring the  
13 keychains/frames into the patient's room). *Label a brown paper bag with your name, the patient's room number,*  
14 *and date and leave on cart outside patient's room.* Leave the bag open so that the inserts can be easily dropped in  
15 afterwards.
- 16 3) Bring the paper inserts and proper number of *single-use ink strips* after donning proper PPE. Obtain fingerprints.  
17 Discard the used inkstrips.
- 18 4) Remove gown and gloves inside the patient's room. Don another pair of gloves to pick up fingerprint inserts and  
19 carry out with you.
- 20 5) Drop the fingerprint inserts in prepared brown paper bag and leave on the cart for "dirty N95 masks". Doff gloves  
21 and mask.
- 22 6) Courier will return the fingerprint inserts in a white paper bag, again labelled with your name, the room number,  
23 and date to the clean utility room. Please retrieve these inserts and place in the keychains or mini-frames.
- 24 7) Put keychains or mini-frames in a bag and label with the patient's MRN. Deliver to Yuhan if in MICU (contact  
25 Danielle Bear if other units), who will mail out once a week.
- 26 8) Document with .3wishestemplate note on CareConnect, put in correct mailing address, and route to Dr. Neville.

27 ***Courier:***

- 28 1) Pick up bin and deliver to UVGI processor.
- 29 2) Log the presence of fingerprint inserts (with HCW's name, patient's room number).
- 30 3) When UVGI cycle is complete, don gloves and remove fingerprints from UV enclosure
- 31 4) Place in white paper bag and label with HCW's name and patient's room number
- 32 5) Place on clean cart and return to unit.

33 ***UVGI Processor***

- 34 1) Acknowledge receipt of bin and items.
- 35 2) Dons appropriate PPE.
- 36 2) Remove fingerprint inserts from the bag and gently place the inserts on shelving unit. Run UVGI.

37

38 **eSupplement 2**

39 **Overview of Artistic Methods and Materials for Personalized Fingerprint Paintings**

40 After describing and offering a family a fingerprint painting, the clinician (usually the bedside nurse) will obtain an  
41 3-5 ink fingerprints from the patient, placing them directly on thick cardstock or watercolor quality paper. The paper  
42 undergoes UV germicidal irradiation if the fingerprints belong to a patient who has COVID-19. A note is added on  
43 the back of the canvas listing a few of the patient's personal attributes, favorites, or family requests. Once received,  
44 the artist refers to this list to devise an approach that will fulfill these requests while incorporating the shape and  
45 placement of the fingerprints. Ideas are first sketched on a separate piece of paper to see what the desired piece  
46 would look like with different color palettes or placements of the drawings incorporating the fingerprints. Due to the  
47 permanence of the ink fingerprints, it is imperative that the artist first organize the subject, outline, and media of the  
48 painting prior to starting the piece. Light sketches are drawn on the paper with pencil. Artists may place removable  
49 coverings on each fingerprint prior to painting to protect them. The artist then paints the entire scene around the  
50 patient's fingerprints, carefully bringing paint to the edges of the ink and allowing the fingerprints to be seamlessly  
51 integrated into the finished product. In some pieces, the fingerprints would be incorporated in clouds, flowers, or  
52 other symbolic images. Materials used for the paintings were acrylic paints, gouache paint, and black India ink. All  
53 of the paintings were made on a gessoed canvas with dimensions of 12 by 9 inches. The final painting highlights the  
54 fingerprints as meaningful elements, as well as represents the attributes of the individual and honors their legacy.  
55 Three examples are displayed below.

56

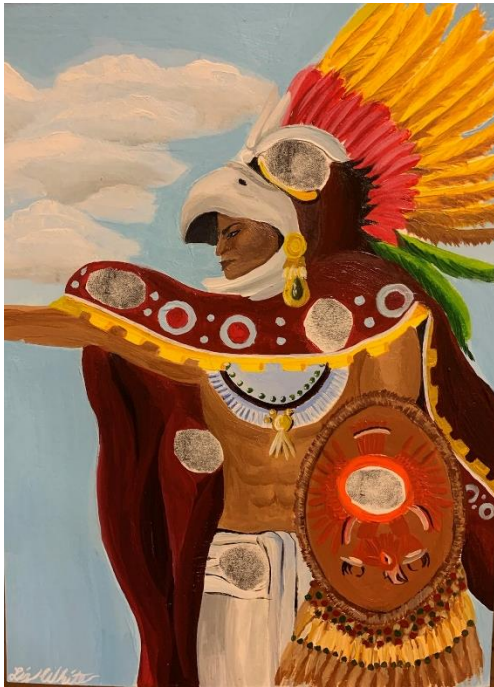

57

58 eFigure1. Painted by Elizabeth White. Materials: acrylic paints.

59

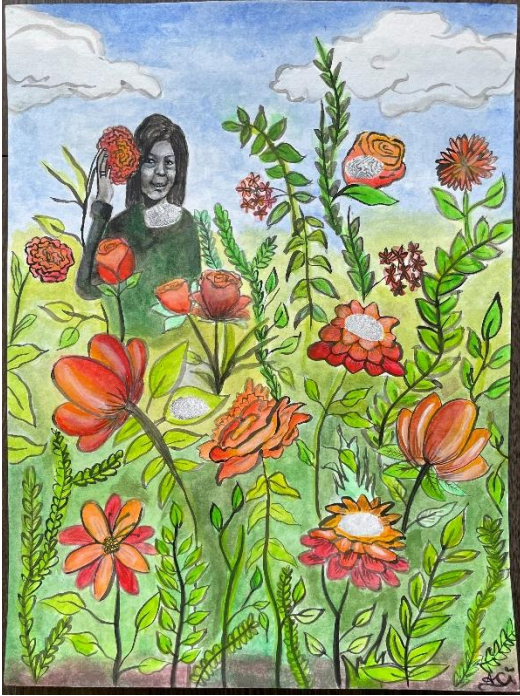

60

61 eFigure2. Painted by Apurva Chaturvedi. Materials: black India ink and acrylic paints.

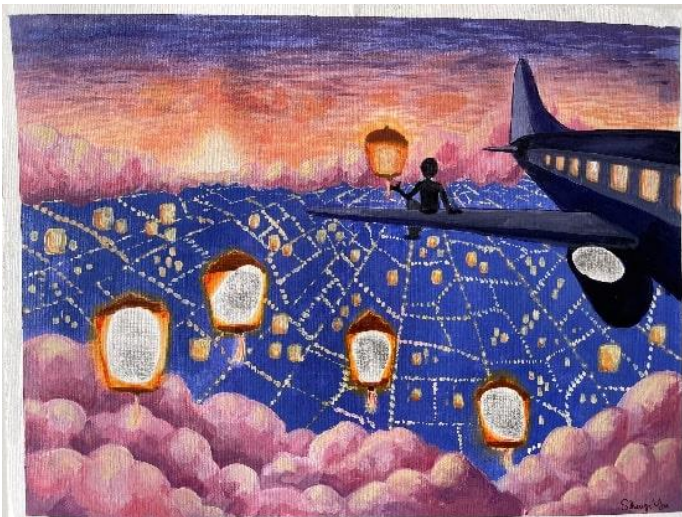

62

63 eFigure3. Painted by Shuyi Yu. Material: acrylic paints.

64
